# Supplementary material for: Colorimetric sensor for highly sensitive and selective detection of copper ion
Source: Royal Society of Chemistry journal article supplement (doi:10.1039/c7ay01335c), 2017-01-01
Supplement: c7ay01335c1.pdf [file c7ay01335c1.pdf]

## *Electronic Supporting Information*

# **Colorimetric sensor for highly sensitive and selective detection of copper ion**

Qi Gao,<sup>ac</sup> Ling Ji,<sup>b</sup> Qiaoning Wang,<sup>c</sup> Kun Yin,<sup>c</sup> Jinhua Li<sup>c</sup>, and Lingxin Chen<sup>\*c</sup>

<sup>a</sup> *Department of Aquaculture, Oceanography Institute, Yantai Research Institute, China Agricultural University, Yantai 264000, China*

<sup>b</sup> *North China Sea Branch of State Oceanic Administration, Qingdao 266033, China*

<sup>c</sup> *Key Laboratory of Coastal Environmental Processes and Ecological Remediation, Yantai Institute of Coastal Zone Research, Chinese Academy of Sciences, Yantai 264003, China*

\*Corresponding author. Yantai Institute of Coastal Zone Research, Chinese Academy of Sciences, 17 Chunhui Road, Laishan District, Yantai 264003, China.

Tel./Fax.: (86)-535-2109130; E-mail address: lxchen@yic.ac.cn (L. Chen).

## **1. Experimental**

### **1.1 Synthesis of ketone-Cy<sup>1</sup>**

The aqueous sodium acetate (100 mg, 1.2 mmol) and solution of heptacyanine Cy.7.Cl (230 mg, 0.45 mmol)<sup>2</sup> were dissolved in anhydrous N, N-dimethylformamide (15 mL) and then heated at 90 °C for 6 hours under Ar atmosphere. Next, the solution was cooled to room temperature, and filtered, concentrated and evaporated under reduced pressure, followed by drying with a vacuum pump to give the red product. Then the ketone-Cy was purified with CH<sub>2</sub>Cl<sub>2</sub>/CH<sub>3</sub>OH (8:2, v/v) by silica chromatography eluting.

### **1.2 Synthesis of Cy-NB<sup>1</sup>**

We dissolved heptacyanine Cy.7.Cl (100 mg, 0.19 mmol) and triethylamine (278 mL, 0.6 mmol) in anhydrous CH<sub>2</sub>Cl<sub>2</sub> (15 mL) at 0 °C, then added the p-nitrobenzoyl chloride (10 mL) dropwise and kept stirring at 0 °C for 30 min. Then the mixture was warmed at room temperature and stirred overnight. For extraction operation, the solution was diluted with CH<sub>2</sub>Cl<sub>2</sub> (30 mL), then the solvent was removed in vacuo to obtain a deep green crude mixture solid. Finally, Cy-NB was isolated by silica chromatography eluting with CH<sub>2</sub>Cl<sub>2</sub>/CH<sub>3</sub>OH (8:2, v/v) as a green solid (40 mg, 38% yield).

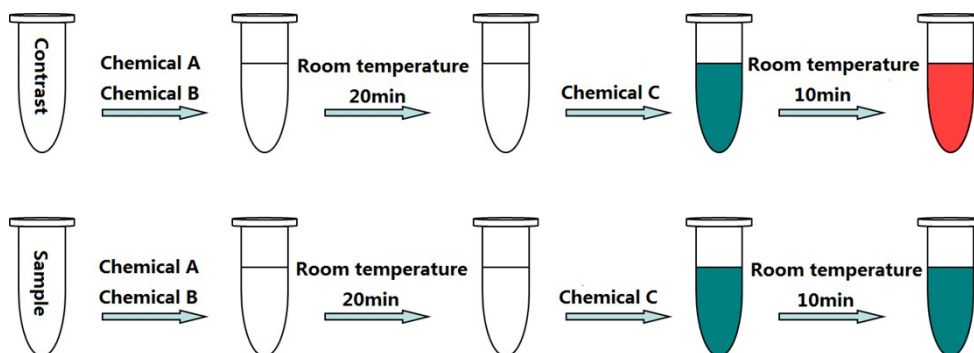

**Fig. S1.** Schematic diagram of the operation after the test sample, where Chemical A is 100  $\mu\text{L}$  of PBS buffer solution in pH 7.4, Chemical B is 20  $\mu\text{L}$  of 5 mM L-Cys solution and Chemical C is 10  $\mu\text{L}$  of 50  $\mu\text{M}$  probe Cy-NB dissolved in dimethylsulfoxide.

## References

- 1 K Yin, F. Yu, W. Zhang and L. Chen. A near-infrared ratiometric fluorescent probe for cysteine detection over glutathione indicating mitochondrial oxidative stress in vivo, *Biosens. Bioelectron.*, 2015, 74, 156–164.
- 2 R Wang, F Yu, L Chen, H Chen, L Wang and W Zhang. A highly selective turn-on near-infrared fluorescent probe for hydrogen sulfide detection and imaging in living cells, *Chem. Commun.*, 2012, 48(96), 11757–11759.

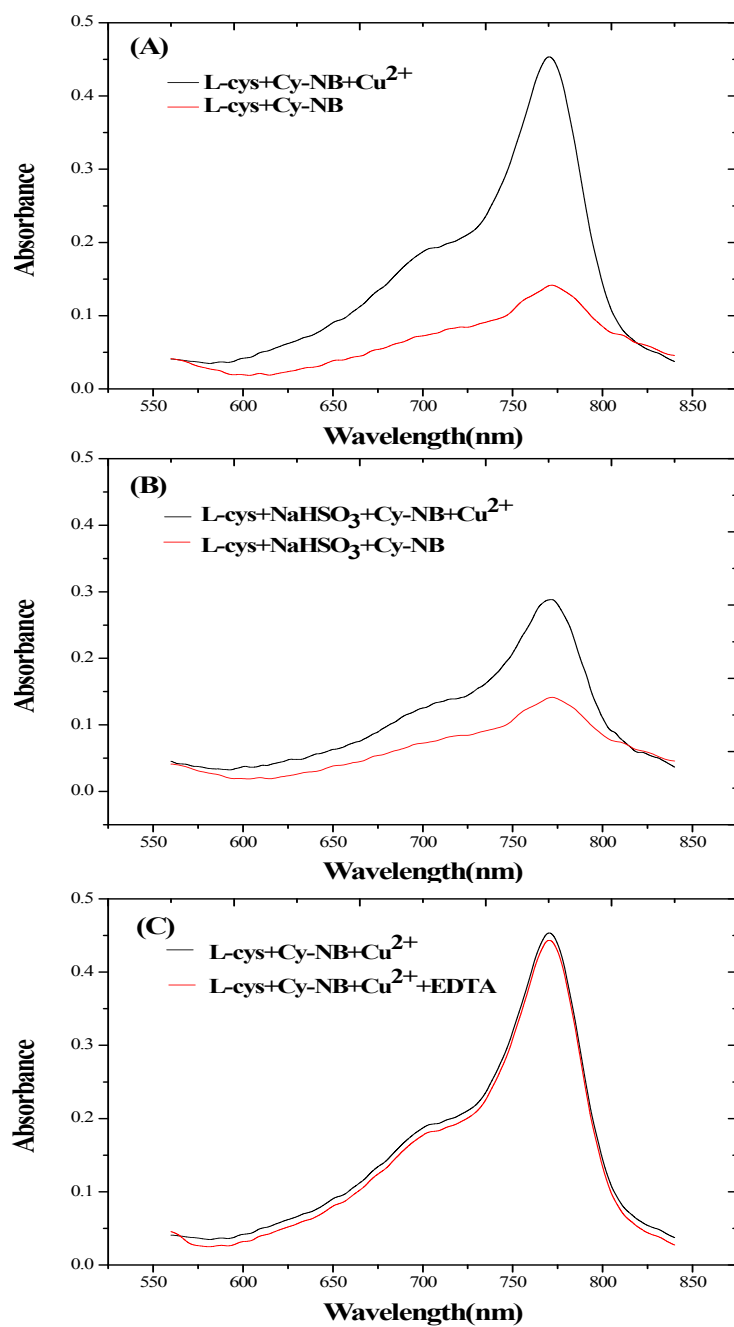

**Fig. S2.** Absorption spectra of Cy-NB which was generated by L-Cys and Cy-NB, (A) in the absence and presence of Cu<sup>2+</sup>, (B) in the absence and presence of Cu<sup>2+</sup> after O<sub>2</sub> was consumed by 0.2 M NaHSO<sub>3</sub>, and (C) in the absence and presence of 2 mM EDTA after L-Cys reacted with Cu<sup>2+</sup>.

## 2. LOD and LOQ calculation details

In our present study, LOD was calculated using the  $3\sigma$  principle.<sup>3,4</sup> Calculation is based on the signal response and standard deviation of the blank. The result presented in the content domain when  $y_D$  converted to concentration using the calibration function,  $y_D = \bar{y}_B + 3\sigma_0$ , where  $\bar{y}_B$  means the average value of the instrument blank response, and  $\sigma_0$  means standard deviation of the blank<sup>3,4</sup>. Herein, we detected 6 blank samples and attained the absorbance values of 0.143, 0.144, 0.143, 0.142, 0.142, 0.145. The absorbance mean value is 0.1432, and the  $\sigma_0$  is 0.001068. So, a specific absorbance value ( $0.1432 + 3 \times 0.001068 = 0.1464$ ) was obtained, and the corresponding concentration can be regarded as LOD. For clarity, the previous linear curve (Fig. 2B, inset) is enlarged within 0–30 nM as Fig. S3. As observed from the blue section, when the absorbance is 0.1464, the corresponding concentration of  $\text{Cu}^{2+}$  is 8.6 nM. Therefore, the LOD of 8.6 nM is attained.

LOQ is calculated using the  $10\sigma$  principle.<sup>3,5</sup> According to the red section of Fig. S3, when the absorbance is 0.1539, the concentration of  $\text{Cu}^{2+}$  is 27.2 nM. So, the LOQ of 27.2 nM is gained.

On the other hand, it has been pointed that the lower limit of the measuring interval can coincide with the LOQ which is higher than the LOD.<sup>6,7</sup> So, the bottom concentration of the linear range could be set at 27.2 nM.

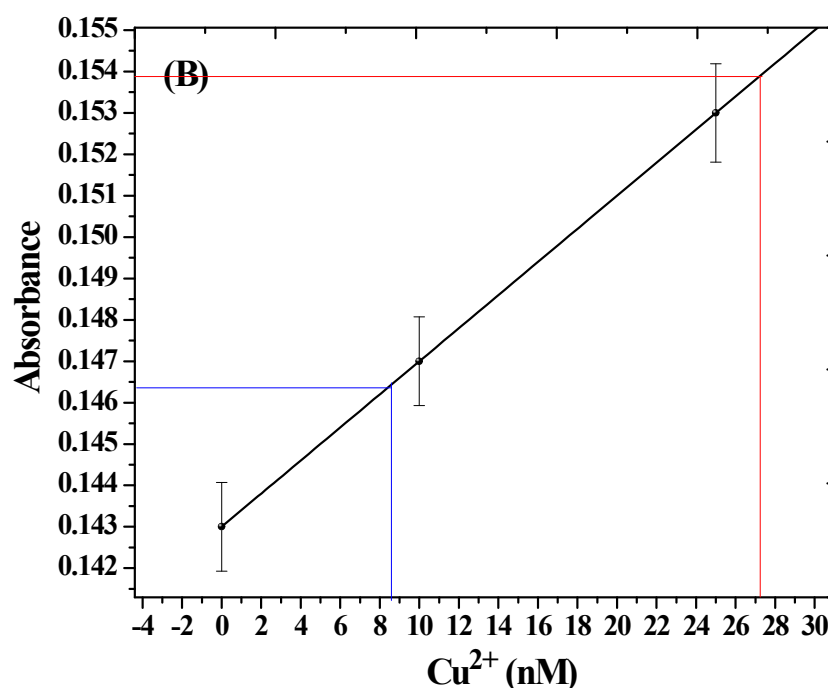

**Fig. S3.** Absorbance versus  $\text{Cu}^{2+}$  concentration within 0–30 nM.

## Reference

3. M. Belter, A. Sajnóg, D. Barałkiewicz, Over a century of detection and quantification capabilities in analytical chemistry—Historical overview and trends, *Talanta* 2014, 129, 606–616.
4. H. Kaiser, *Fresenius' Z. Anal. Chem.* 1966, 216, 80–94.
5. J. Carlson, A. Wysoczanski, E. Voigtman, Limits of quantitation—Yet another suggestion, *Spectrochimica Acta Part B* 2014, 96, 69–73.
6. Elvar Theodorsson, “Limit of detection, limit of quantification and limit of blank”,

from EFLM European Federation of Clinical Chemistry and Laboratory Medicine (EurachemA Focus for Analytical Chemistry in Europe).

7. The Fitness for Purpose of Analytical Methods-A laboratory Guide to Method Validation and Related Topics,

[https://eurachem.org/images/stories/Guides/pdf/MV\\_guide\\_2nd\\_ed\\_EN.pdf](https://eurachem.org/images/stories/Guides/pdf/MV_guide_2nd_ed_EN.pdf)
